# Supplementary material for: How does the water springtail optically locate proper habitats? Spectral sensitivity of photo- and polarotaxis inPodura aquatica
Source: Oxford University Press journal article supplement (doi:10.1242/jeb.199760), 2019-01-01
Supplement: jeb199760supp.pdf [file jeb199760supp.pdf]

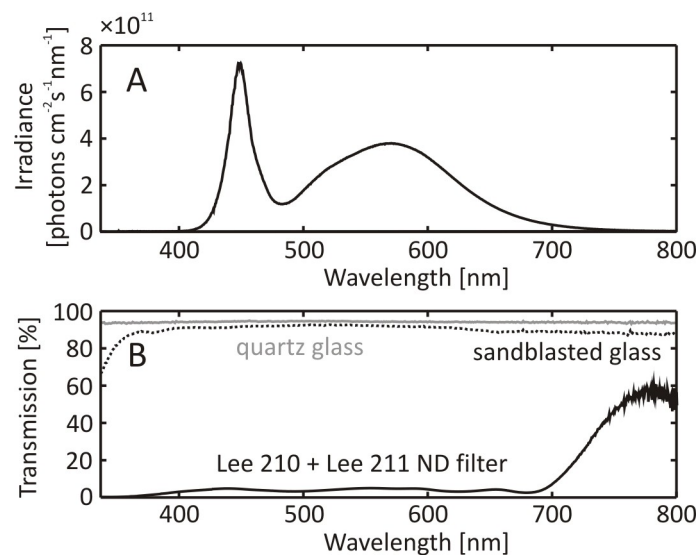

**Figure S1. Emission and transmission spectra of components in our project.** (A) Emission spectrum of the cool white LED used for lighting the containers with field-caught *P. aquatica*. Cosine corrector of spectrometer was placed at the place of the containers. Total photon flux (area under curve) was  $1.47 \times 10^{14}$  photons $\cdot$ cm<sup>-2</sup> $\cdot$ s<sup>-1</sup>. (B) Transmission spectrum of one pair of Lee 210 and Lee 211 neutral density filters (black line), the 3 mm sandblasted glass (dotted line) and the 1 mm quartz glass (grey line).

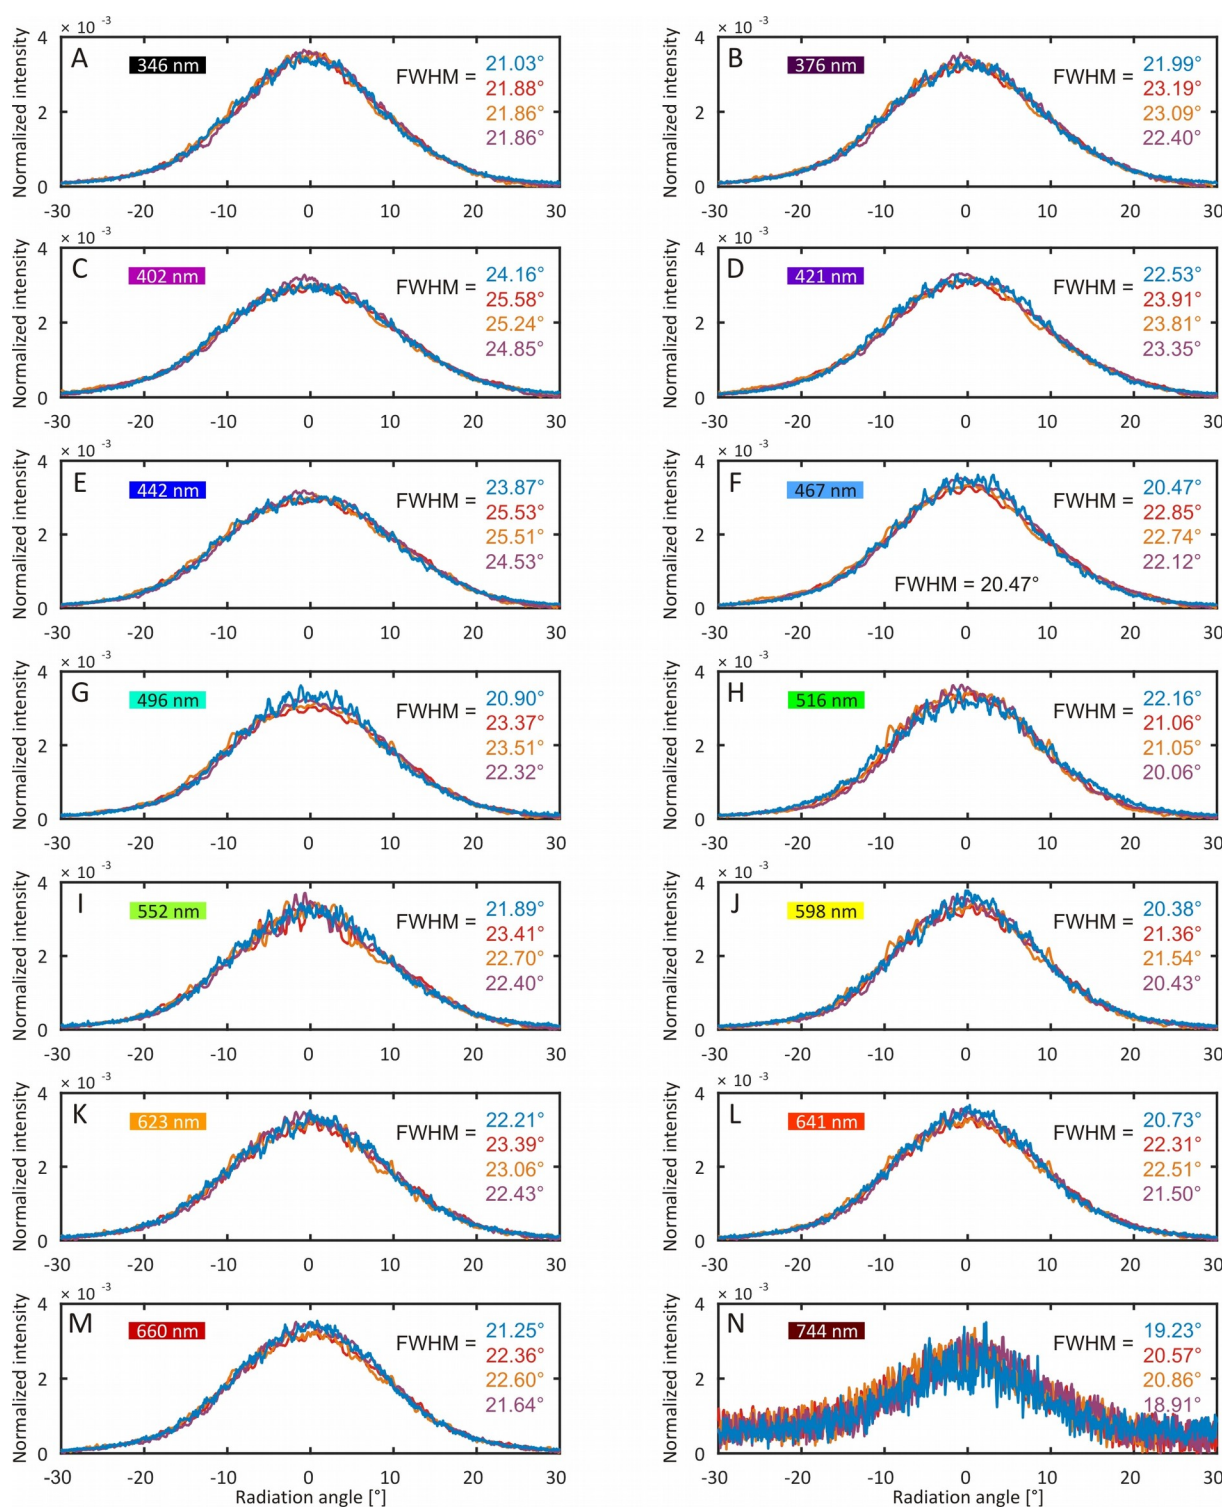

**Figure S2. Normalized intensity of light exiting the light-guide outputs measured as a function of angle for all 14 wavelengths. Full-width half-maximum of fitted Gaussian curves are also displayed.**

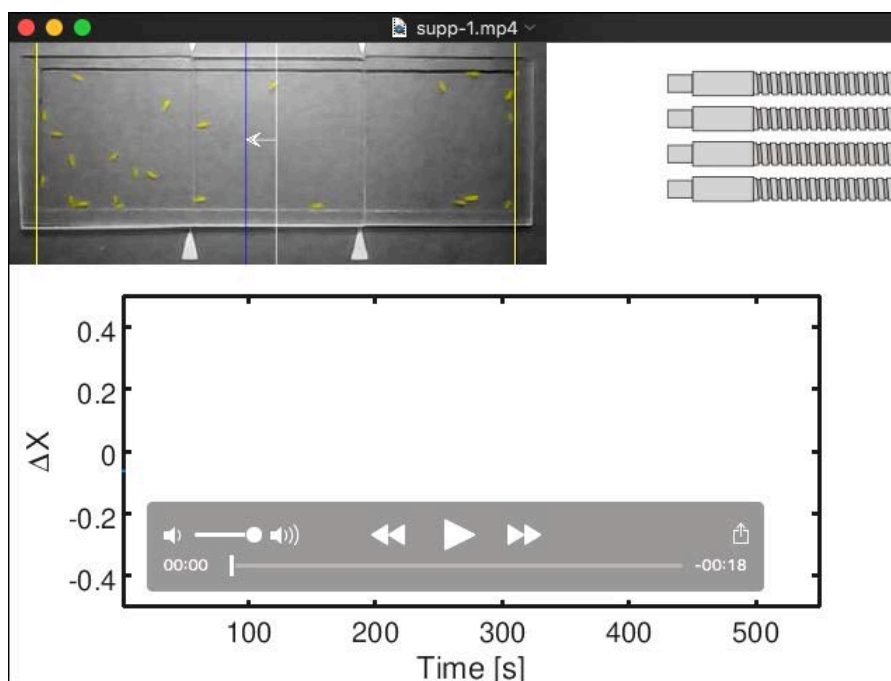

**Movie 1.** A short demonstration of the trials and data evaluation of experiment 1 for a  $\lambda_{\text{stimulus}} = 442 \text{ nm}$  stimulus.

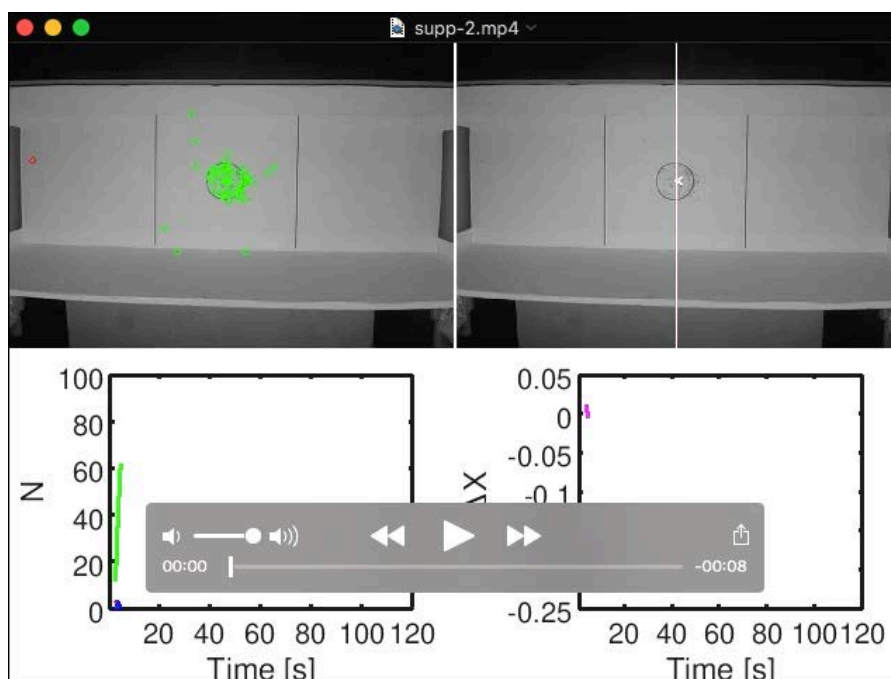

**Movie 2.** Evaluation method for the trials of experiments 2 and 3. This example shows a trial when a 100% horizontally (left) and 100% vertically (right) polarized stimulus pair was applied.
